# Supplementary material for: Complementary Targeting of Rb Phosphorylation and Growth in Cervical Cancer Cell Cultures and a Xenograft Mouse Model by SHetA2 and Palbociclib
Source: MDPI journal article supplement (doi:10.3390/cancers12051269), 2020-05-17
Supplement: s1 [file s1]

# Supplementary Materials: Complementary Targeting of Rb Phosphorylation and Growth in Cervical Cancer Cell Cultures and a Xenograft Mouse Model by SHetA2 and Palbociclib

Amy L. Kennedy, Rajani Rai, Zitha Redempta Isingizwe, Y. Daniel Zhao, Stanley A. Lightfoot and Doris M. Benbrook

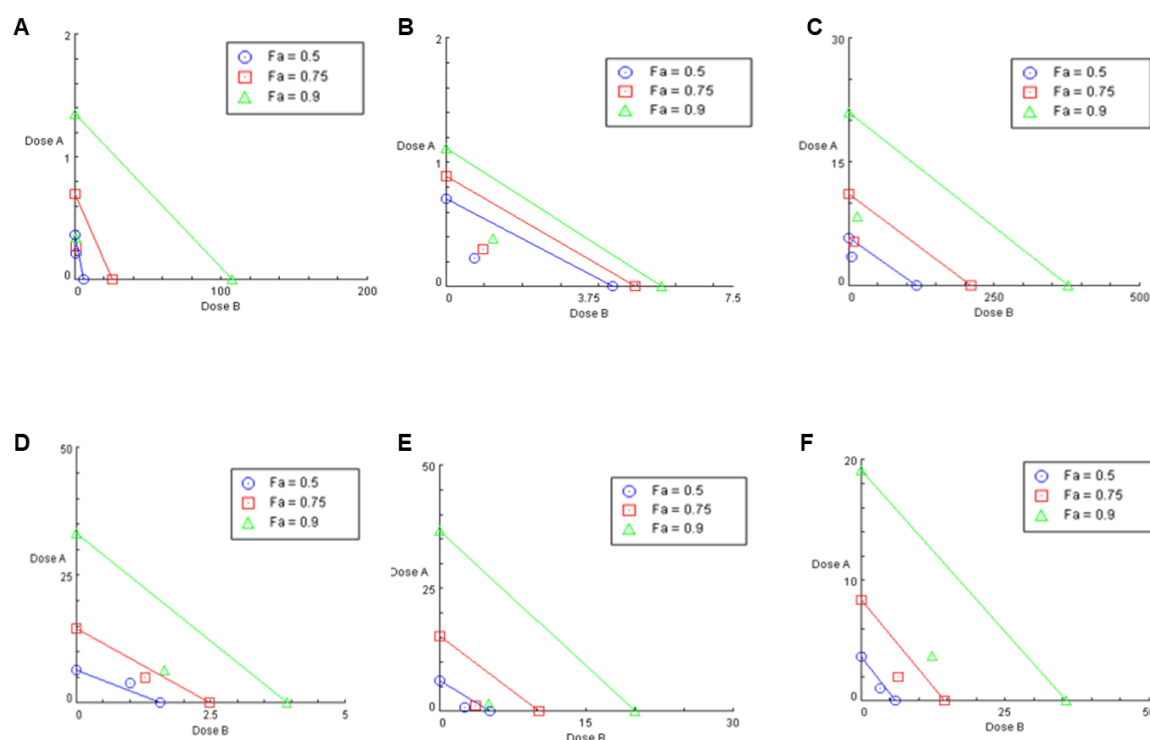

**Figure S1.** Replicate Isobolograms for (A-B) C-33A, (C-D) CaSki, and (E-F) SiHa cervical cancer cell lines.

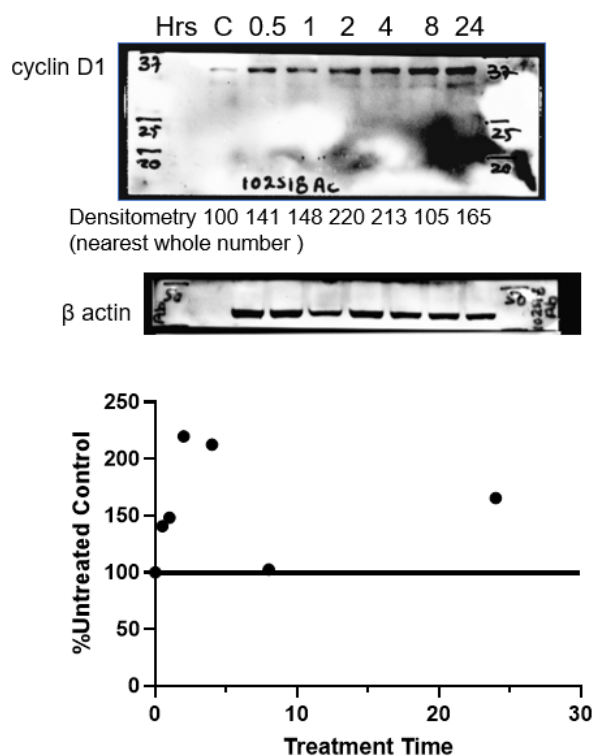

**Figure S2.** Western blots of SiHa cultures treated with NNK for the indicated amount of time or control solvent for 0.5 h (C) are shown on top. Densitometry of the western blots is shown below. \* Membranes were cut to reduce non-specific binding bands.

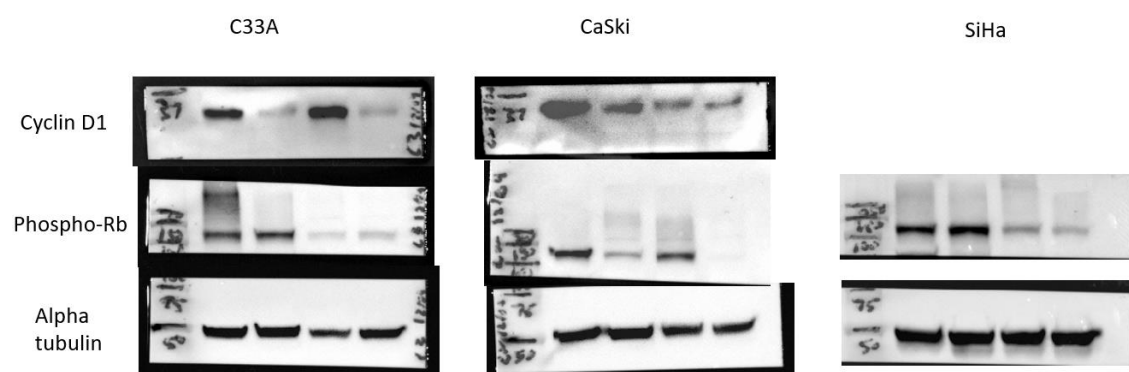

**Figure S3.** Full Western Blot Images for Figures 2 and 3.
